# Supplementary material
Source: Springer Nature journal article supplement (https://www.springermedizin.de/resource/supplementary/12889_2012_3850_MOESM1_ESM.pdf/9490754)

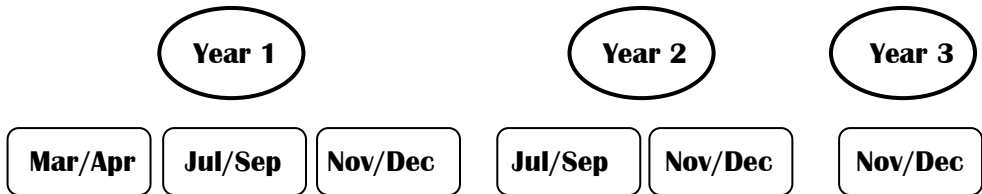

**Intervention schools**

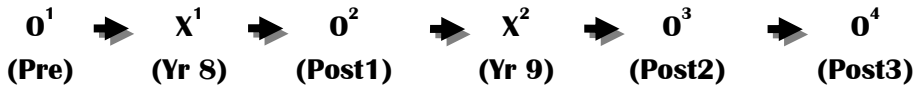

**Control school**

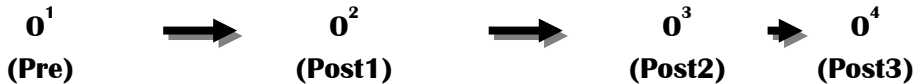

**Key: O Data Collection X Classroom Intervention**

Supplement: MOESM1 [file 9490754]
